# Supplementary material for: Evaluation of pneumatic nebulization and ns-laser ablation ICP-MS for bulk elemental analysis and 2-dimensional element mapping of iron meteorites
Source: Royal Society of Chemistry journal article supplement (doi:10.1039/c3ja50387a), 2014-01-01
Supplement: c3ja50387a1.pdf [file c3ja50387a1.pdf]

## Appendix

The limits of detection for both laser-ablation approaches were calculated basing on 3s of the gas blank and the sensitivity, calculated using the external standard meteorite:

$$LoD_x = \frac{C_x^{std}}{I_x^{std}} \cdot 3s_{gas\ blank}$$

For the case of bulk LA-ICP-MS the intensities of Canyon Diablo external standard at instrument settings corresponding to that of samples were used to calculate the LoDs.

For the case of mapping LA-ICP-MS the intensities of Cheder external standard at instrument settings corresponding to that of Darinskoe analysis were used to calculate the LoDs.

It is important to stress again that sensitivity of the external standard depends on instrument settings (mainly on laser frequency, beam diameter and energy fluence), while the total level and 3s of the gas blank for most elements stays relatively constant. In this work we had relatively high LoDs for Pd and Mo in bulk LA. It is caused by contamination from samples with high content of Mo and Pd analyzed before. But the background level of these elements had decreased 10-100 times when we started mapping at another analytical session, because contamination was

continuously washing out. So it is possible that even with the same instrument LoDs are different at different days.

| CRM       | Matrix          | Provider          |
|-----------|-----------------|-------------------|
| NBS 2423a | Ductile iron    | NIST <sup>1</sup> |
| NBS 1286  | Low-alloy steel | NIST <sup>1</sup> |
| NBS 341   | Ductile iron    | NIST <sup>1</sup> |
| NBS 362   | Low-alloy steel | NIST <sup>1</sup> |
| NIST 610  | Synthetic glass | NIST <sup>1</sup> |
| GSD-1G    | Basalt glass    | USGS <sup>2</sup> |

**Table 1** List of CRMs used. <sup>1</sup> - National Institute of Standards and Technology, <sup>2</sup> - United States Geological Survey

|                 | Ru  | Rh   | Pd   | Os  | Ir  | Pt  | Au   | Re   |
|-----------------|-----|------|------|-----|-----|-----|------|------|
| Recovery, %     | 43  | 4.3  | 58   | 1.2 | 58  | 70  | 89   | 98   |
| Breakthrough, % | 57  | 95   | 0.03 | 3.0 | 40  | 2.2 | 0.2  | 0.04 |
|                 | Fe  | Co   | Ni   | Cu  | Zn  | Mo  | Cd   |      |
| Recovery, %     | 35  | 0.07 | 0.03 | 0.3 | 18  | 11  | 0.04 |      |
| Breakthrough, % | 110 | 100  | 100  | 99  | 110 | 90  | 99   |      |

**Table 2** Recoveries of the elements after the anion-exchange column separation are calculated as their mass found in analyte fraction relative to the mass loaded. Breakthrough is calculated as the mass found in the wash fraction relative to the amount loaded.

| X Series II ICP mass spectrometer |                                                                                                                                               |
|-----------------------------------|-----------------------------------------------------------------------------------------------------------------------------------------------|
| Plasma power                      | 1400 W                                                                                                                                        |
| Sampler cone                      | Ni Xt cone; 1.1 mm aperture diameter                                                                                                          |
| Skimmer cone                      | Ni Xt cone; 0.75 mm aperture diameter                                                                                                         |
| Argon gas flow rates              | Cool 13.0 L·min <sup>-1</sup><br>Auxiliary 0.70 L·min <sup>-1</sup><br>Nebulizer 0.95 L·min <sup>-1</sup>                                     |
| Nuclides monitored                | <sup>51</sup> V, <sup>52</sup> Cr, <sup>55</sup> Mn, <sup>59</sup> Co, <sup>60</sup> Ni, <sup>63</sup> Cu, <sup>75</sup> As, <sup>95</sup> Mo |
| UP193HE ArF* excimer based laser  |                                                                                                                                               |
| He carrier gas flow rate          | 0,182 L·min <sup>-1</sup> He                                                                                                                  |
| Laser wavelength                  | 193 nm                                                                                                                                        |
| Laser pulse duration              | 20 ns                                                                                                                                         |
| Laser beam diameter               | 400 μm                                                                                                                                        |
| Laser fluence                     | 9-10 J·cm <sup>-2</sup>                                                                                                                       |
| Lateral scanning speed            | 10 μm·s <sup>-1</sup>                                                                                                                         |
| Total area ablated                | 1.52 mm <sup>2</sup>                                                                                                                          |

**Table 3** ICP-MS and LA instrument settings used for analysis of steel and glass CRMs for determining RSFs.

| Co   | Ni     | Cu  | Ga   | Ge    | As   | Mo  | Ru   | Rh   | Pd   | W     | Re    | Os   | Ir    | Pt   | Au    | Pb    | Method         | ref |
|------|--------|-----|------|-------|------|-----|------|------|------|-------|-------|------|-------|------|-------|-------|----------------|-----|
|      |        |     |      |       |      |     | 5.9  |      |      |       |       |      |       |      |       |       | Gravimetry     | 1   |
|      |        |     |      |       |      |     |      |      |      |       |       |      |       |      |       | 0.224 | ID-MS          | 2   |
|      |        |     |      |       |      | 7.5 |      |      |      |       |       |      | 2.0   | 5.7  | 1.43  |       | ID-MS          | 3   |
|      |        |     |      |       |      |     |      | 1.5  | 3.6  |       |       |      |       |      |       |       | INAA           | 4   |
|      |        |     |      |       |      |     |      |      |      |       |       |      |       |      |       |       | Spectrographic | 5   |
|      |        |     |      |       |      |     |      |      |      |       | 0.181 |      |       |      | 1.47  |       | INAA           | 6   |
|      |        | 125 | 79.7 | 322   | 12.4 | 7.4 |      |      | 3.6  |       |       |      |       |      |       |       | INAA           | 7   |
|      |        |     | 79.7 | 324   |      |     |      |      |      |       |       |      |       |      |       |       | INAA           | 8   |
|      | 71 900 |     | 81.8 | 328   |      |     |      |      |      |       |       |      |       |      |       |       | INAA           | 9   |
|      |        |     |      |       |      |     |      |      |      |       |       |      | 1.86  |      |       |       | INAA           | 10  |
|      |        | 138 |      |       |      |     |      |      |      |       | 0.252 | 2.07 | 2.02  |      |       |       | INAA           | 11  |
|      | 69700  |     | 80   | 337   |      |     |      |      |      |       |       |      |       |      |       |       | INAA           | 12  |
|      |        |     |      |       |      |     |      |      |      |       |       |      | 2.175 |      | 1.43  |       | INAA           | 13  |
|      |        |     | 80.4 | 324   |      |     |      |      |      |       |       |      | 1.97  |      |       |       | AAS, INAA      | 14  |
|      |        |     |      |       |      |     | 5.2  |      |      |       |       | 2.1  | 2.0   |      | 1.47  |       | INAA           | 15  |
|      | 69800  |     |      |       | 12.4 |     |      |      |      | 1.00  |       |      | 2.36  |      | 1.54  |       | INAA           | 16  |
|      |        |     |      |       |      |     |      |      | 4.2  |       |       |      |       |      |       |       | ID-TIMS        | 17  |
|      | 69100  |     |      |       |      |     | 5.7  |      |      |       | 0.198 | 2.2  | 2.18  | 5.8  | 1.33  |       | INAA           | 18  |
| 4620 | 69000  | 148 |      |       | 12.4 |     |      |      |      | 1.00  | 0.210 |      | 2.10  |      | 1.60  |       | INAA           | 19  |
|      | 69800  |     |      |       |      |     |      | 1.6  |      |       |       | 2.13 | 2.01  |      | 1.52  |       | INAA           | 20  |
| 4640 | 69100  | 150 | 82   | 321   | 13   |     |      |      |      | 1.055 | 0.246 |      | 2.28  | 6.2  | 1.54  |       | INAA           | 21  |
| 4680 | 69200  | 148 | 83.8 | 322   | 12.7 |     |      |      |      | 0.99  | 0.228 |      | 2.17  | 6.3  | 1.57  |       | INAA           | 21  |
|      | 69800  |     |      |       |      |     | 5.24 |      | 4.4  |       |       |      |       |      |       |       | ETV-AAS        | 22  |
| 4660 | 70100  | 152 | 81.8 | 327   | 13.1 |     |      |      |      | 1.11  | 0.25  |      | 2.32  | 6.2  | 1.56  |       | INAA           | 23  |
| 4630 | 69300  | 148 | 82.1 | 323   | 13   |     |      |      |      | 1.06  | 0.253 |      |       | 6.1  | 1.534 |       | INAA           | 24  |
| 4650 | 69300  | 150 | 83   | 330   | 13   |     |      |      |      | 1.07  | 0.234 |      |       | 6.3  | 1.552 |       | INAA           | 24  |
|      |        | 142 |      | 315   |      |     | 5.4  | 1.42 | 4.1  |       | 0.207 |      |       | 6.6  | 1.424 |       | PN-ICP-MS      | 25  |
| 4647 | 69664  | 145 | 81.4 | 324.8 | 12.8 | 7.5 | 5.5  | 1.5  | 3.98 | 1.04  | 0.226 | 2.13 | 2.11  | 6.16 | 1.50  | 0.224 | Average        |     |

**Table 4** Compilation of literature data (in µg/g) on the elemental composition of the Canyon Diablo meteorite.

## References

- 1 T. Hara and E.B. Sandell, *Geochimica et Cosmochimica Acta*, 1960, **21**, 145-150.
- 2 R. R. Marshall and J. Feitknecht, *Geochimica et Cosmochimica Acta*,  
5 1964, **28**, 365-379.
- 3 G. W. Wetherill, *Journal of Geophysical Research*, 1964, **69**, 4403-4408.
- 4 P. A. Baedecker and W. D. Ehmann, *Geochimica et Cosmochimica Acta*, 1965, **29**, 320-342.
- 10 5 W. Nichiporuk and H. Brown, *Journal of Geophysical Research*, 1965, **70**, 459-470.
- 6 K. F. Fouche and A. A. Smales, *Chem. Geol.*, 1966, **1**, 329-339.
- 7 A. A. Smales, D. Mapper and K. F. Fouche, *Geochimica et Cosmochimica Acta*, 1966, **31**, 673-720.
- 15 8 K. F. Fouche and A.A. Smales, *Chem. Geol.*, 1967, **2**, 5-33.
- 9 J. T. Wasson, *Journal of Geophysical Research*, 1967, **72**, 721-730.
- 10 J. Kimberlin, C. Charoonratana and J. T. Wasson, *Radiochim. Acta*, 1968, **10**, 69-76.
- 11 U. Herpers, W. Herr and R. Wölfle, *Meteorite Research*, 1969, **12**,  
20 387-396.
- 12 R. Bauer and R. Schaudy, *Chem. Geol.*, 1970, **6**, 119-131.
- 13 W. D. Ehmann, P. A. Baedecker and D. M. McKown, *Geochimica et Cosmochimica Acta*, 1970, **34**, 493-507.
- 14 J. T. Wasson, *Icarus*, 1970, **12**, 407-423.
- 25 15 J. H. Crocket, *Geochimica et Cosmochimica Acta*, 1972, **36**, 517-535.
- 16 E. R. D. Scott, *Earth and Planetary Science Letters*, 1977, **37**, 273-284.
- 17 N. Mermelengas, R. De Laeter and K. J. R. Rosman, *Geochimica et Cosmochimica Acta*, 1979, **43**, 747-753.
- 30 18 E. Pernicka and J. T. Wasson, *Geochimica et Cosmochimica Acta*, 1987, **51**, 1717-1726.
- 19 K. L. Rasmussen, D. J. Malvin and J. T. Wasson, *Meteoritics*, 1988, **23**, 107-112.
- 20 D. E. Ryan, J. Holzbecher and R.R. Brooks, *Chem. Geol.*, 1990, **85**,  
35 295-303.
- 21 J. T. Wasson and X. Ouyang, *Geochimica et Cosmochimica Acta*, 1990, **54**, 3175-3183.
- 22 M. Hoashi, R. R. Brooks and R. D. Reeves, *Chem. Geol.*, 1993, **106**, 207-218.
- 40 23 B. G. Choi, X. Ouyang and J.T. Wasson, *Geochimica et Cosmochimica Acta*, 1995, **59**, 593-612.
- 24 J. T. Wasson and G. W. Kallemeyn, *Geochimica et Cosmochimica Acta*, 2002, **66**, 2445-2473.
- 25 M. D'Orazio and L. Folco, *Geostandards Newsletter*, 2003, **27**, 215-  
45 225.
